# Supplementary material for: ΔNp63α activates CD82 metastasis suppressor to inhibit cancer cell invasion
Source: PubMed Central journal article supplement — Cell Death Dis. 2014 Jun 5;5(6):e1280–. doi: 10.1038/cddis.2014.239 (PMC4611714; doi:10.1038/cddis.2014.239), 2014-06-05
Supplement: cddis2014239x1.pdf [file cddis2014239x1.pdf]

## Supplementary Information

**Figure S1.**  $\Delta$ Np63 $\alpha$  inhibits cell invasion. (a) Stable Hs-578T, H1299 and A549 cells were subjected to transwell assays for cell invasion. Twenty-four hours after plating, invading cells were fixed and stained with crystal violet and photographed under a light microscope. Representative pictures from three independent experiments are shown. Scale bars = 200  $\mu$ m.

**Figure S2.**  $\Delta$ Np63 $\alpha$  affects gene expression in Hs-578T cells. Hs-578T cells stably expressing either vector control (C), wild type (WT) or mutant (C306R or C526W)  $\Delta$ Np63 $\alpha$  were subjected to gene expression profiling using Affymetrix human genome U133A 2.0 arrays. (a) Gene expression profile from Hs-578T stable cells was depicted as a heatmap. Heatmap shows genes significantly altered ( $P < 0.05$ ) by  $\Delta$ Np63 $\alpha$  expression in two independent experiments. Blue: down-regulation; white: no change; orange: up-regulation. (b) CD82 expression in Hs-578T stable cells as assessed by gene array.

**Figure S3.** CD82 is essential for  $\Delta$ Np63 $\alpha$ -mediated inhibition of cell invasion. (a) Hs-578T cells were infected with retrovirus expressing CD82 or an empty vector control (C) and selected by puromycin resistance. Stable Hs-578T cells were subjected to transwell assays for cell invasion, as previously described. Representative images from three independent experiments are shown. Scale bars = 100  $\mu$ m. (b – d) Hs-578T,

H1299 and A549 cells were infected with recombinant retrovirus encoding wild type murine  $\Delta$ Np63 $\alpha$  or a vector control, and subsequently infected with either one of three independent lentivirus expressing shRNA against CD82 (shCD82-1, shCD82-2 and shCD28-3), or a control shRNA (shC). Stable cells were subjected to transwell assays for cell invasion, as previously described. Representative pictures from three independent experiments are shown. Scale bars = 200  $\mu$ m. (e – g) Hs-578T cells expressing WT  $\Delta$ Np63 $\alpha$  were subsequently infected with two additional lentivirus expressing shRNA against CD82 (shCD82-4 and shCD28-5), or a control shRNA (shC). (e) Whole-cell lysates were subjected to western blotting, as indicated. (f – g) Stable cells were subjected to cell invasion assays as described above. (f) Invading cells were photographed. Scale bars = 100  $\mu$ m. (g) Cell invasion results are presented as means and SE from three independent experiments.

**Figure S4.** CD82 mediates  $\Delta$ Np63 $\alpha$ -induced inhibition of cell invasion. Hs-578T and H1299 cells were infected with recombinant retrovirus encoding wild type murine  $\Delta$ Np63 $\alpha$  or a vector control. Stable cells were then infected with lentivirus expressing shRNA against CD82 (shCD82-1) or a control shRNA (shC). Cells expressing  $\Delta$ Np63 $\alpha$  and shCD82-1 were subsequently infected with lentivirus expressing CD82 in order to revert the rescue of cell invasion by CD82 ablation. (a) Whole-cell lysates were subjected to western blotting, as indicated. (d) Stable cells were subjected to transwell assays for cell invasion, as described previously. Invading cells were photographed (left panels) and quantitated (right panels). Results presented as representative images

(left) or means and SE (right) from three independent experiments. Scale bars = 200  $\mu\text{m}$ .

**Figure S5.** p63 ablation-induced cell invasion is partly mediated by CD82. **(a)** FaDu and MCF-10A cells were infected with lentivirus expressing shRNA against p63 (shp63) or a control shRNA (shC). **(a)** Cells were subjected to transwell cell invasion assays, as described previously. Representative images from three independent experiments are shown. **(b)** FaDu and MCF-10A cells expressing shp63 or shC were infected with retrovirus expressing CD82 or a vector control (Vec). Cells were subjected to transwell cell invasion assays, as described previously. Representative images from three independent experiments are shown. **(c)** GSK3 $\beta$  ablation induces cell invasion via down-regulation of CD82. FaDu cells were infected with lentivirus expressing shRNA against GSK3 $\beta$  (sh3 $\beta$ ) or a control (shC), and subsequently infected with recombinant retrovirus expressing either CD82 or a vector control (C). Puromycin-resistant cells were subjected cell invasion assays, as described previously. Images representative of three independent experiments. Scale bars = 200  $\mu\text{m}$ .

**Table S1.** List of known target genes regulated by  $\Delta\text{Np63}\alpha$  (fold change >2) detected by Affymetrix array. Experimental evidence from the literature include identification in global expression profile analyzes after altering p63 cellular levels, validation of gene expression changes at the transcriptional level, identification of candidate response

elements with subsequent testing in transcriptional reporter assays, and/or chromatin immunoprecipitation studies to verify occupancy of p63 at genomic loci.

**Table S2.** Ontological classification of  $\Delta$ Np63 $\alpha$ -regulated genes. Hs-578T cells stably expressing  $\Delta$ Np63 $\alpha$  or a vector control were profiled by Affymetrix array (n = 2). Genes whose expression was two fold or more than that of the vector (P < 0.05) were classified ontologically using DAVID Bioinformatics Resources 6.7.

**Table S3.** List of genes up-regulated by wild type  $\Delta$ Np63 $\alpha$  classified by ontology. Hs-578T cells stably expressing  $\Delta$ Np63 $\alpha$  or a vector control were profiled by Affymetrix array (n = 2). Genes whose expression was two fold or more than that of the vector (P < 0.05) were classified ontologically using DAVID Bioinformatics Resources 6.7.

**Table S4.** Oligonucleotides used for mutagenesis, ChIP, PCR, Q-PCR, siRNA and shRNA.

**a**

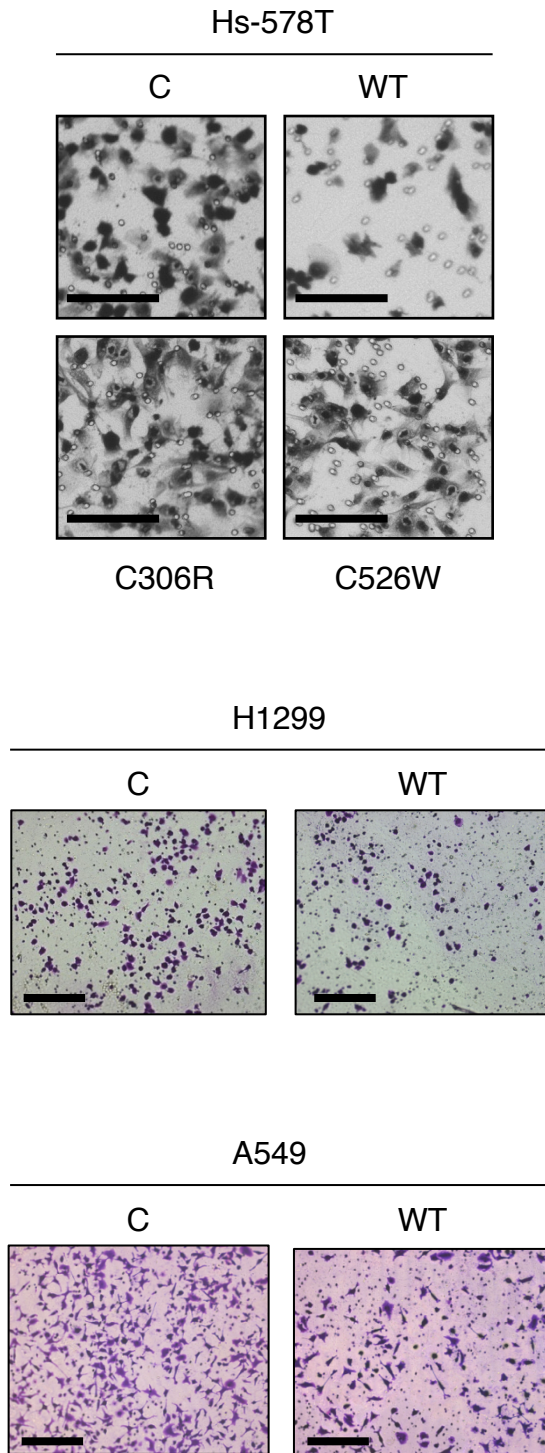

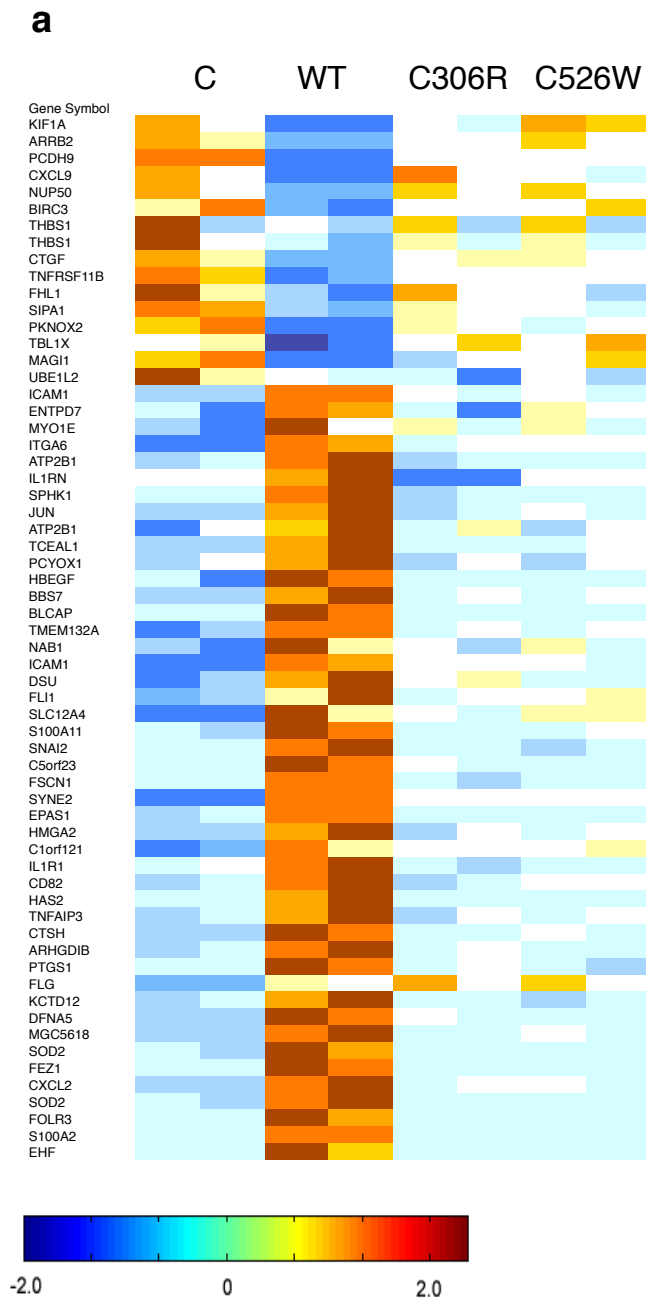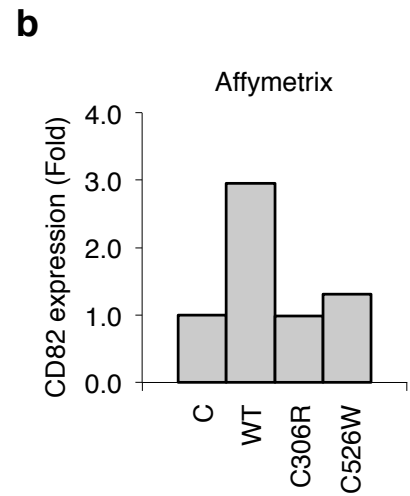

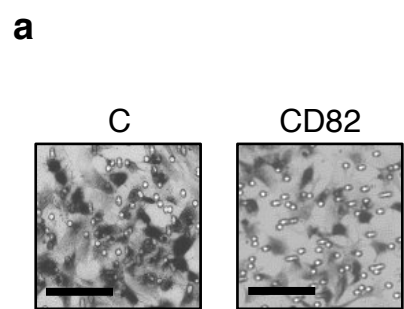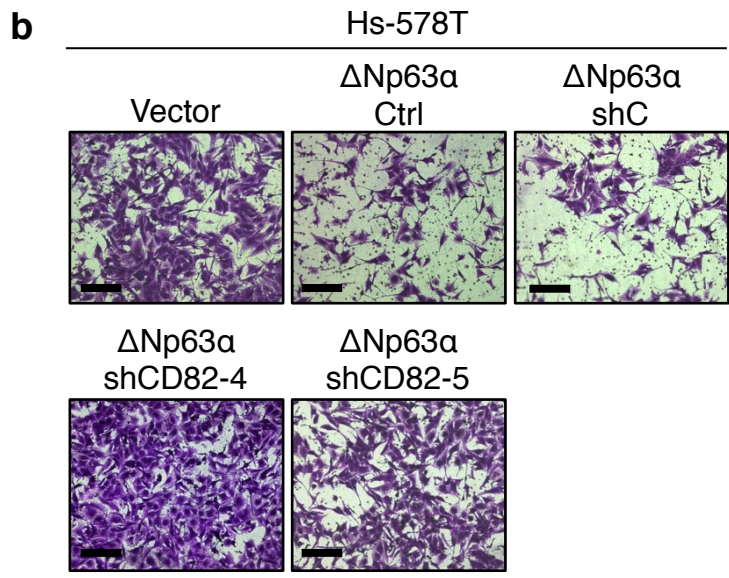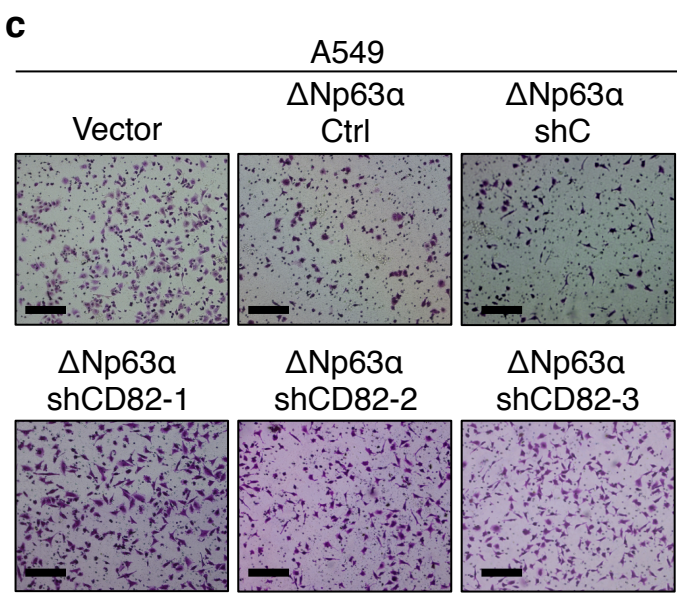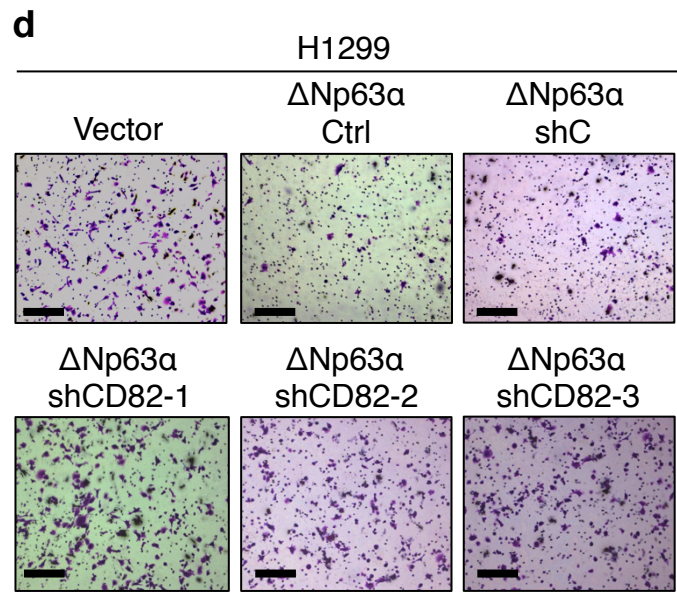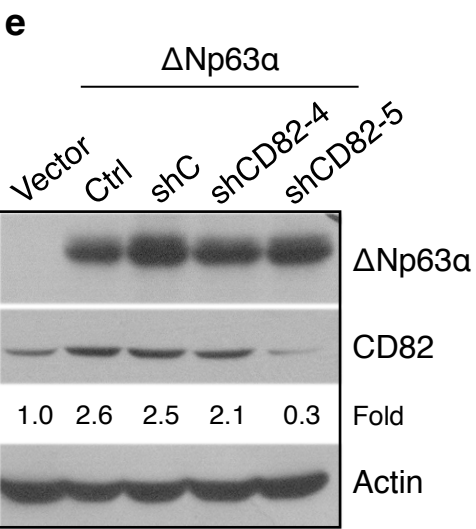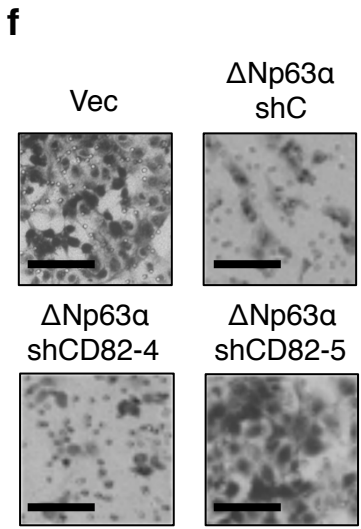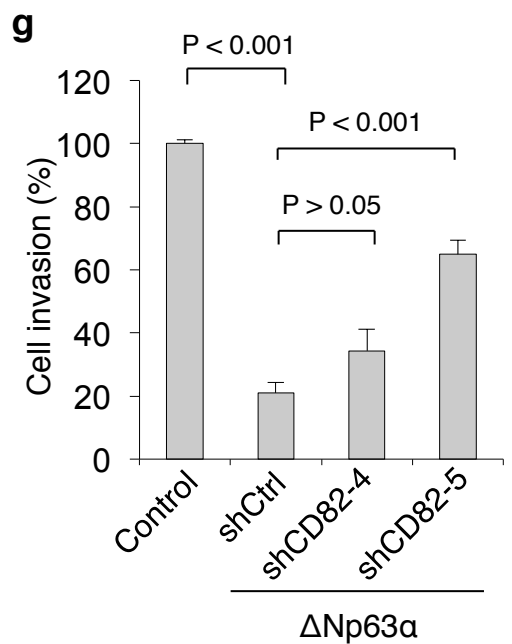

Supplemental Figure S3, Wu et al.

**a**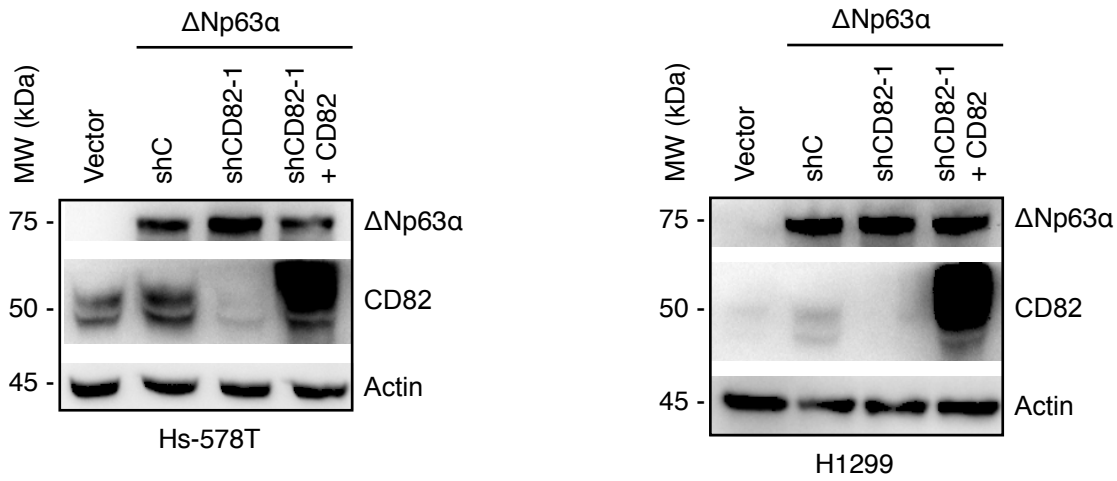**b**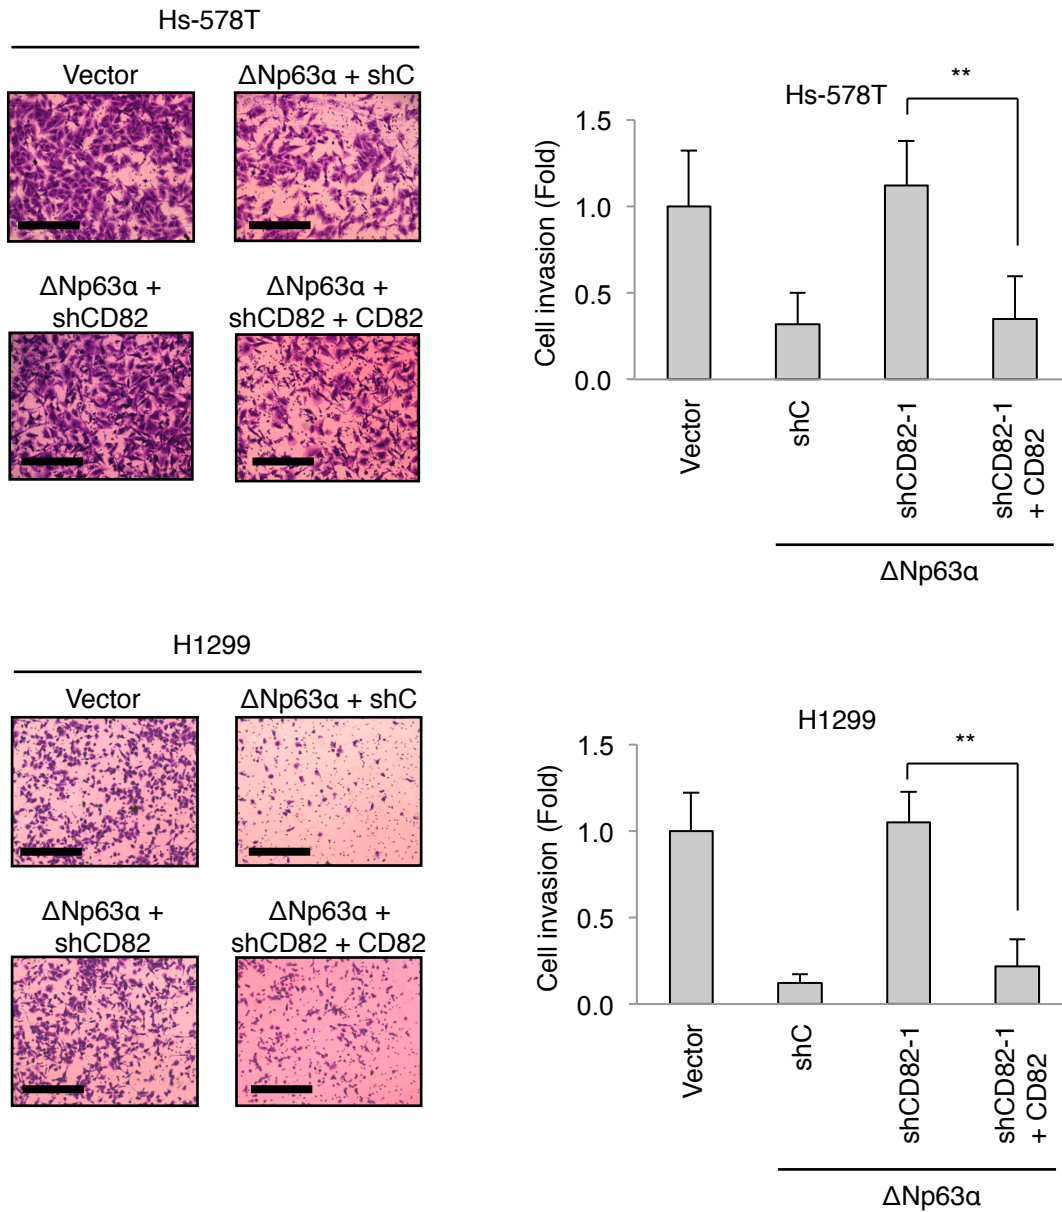



**a**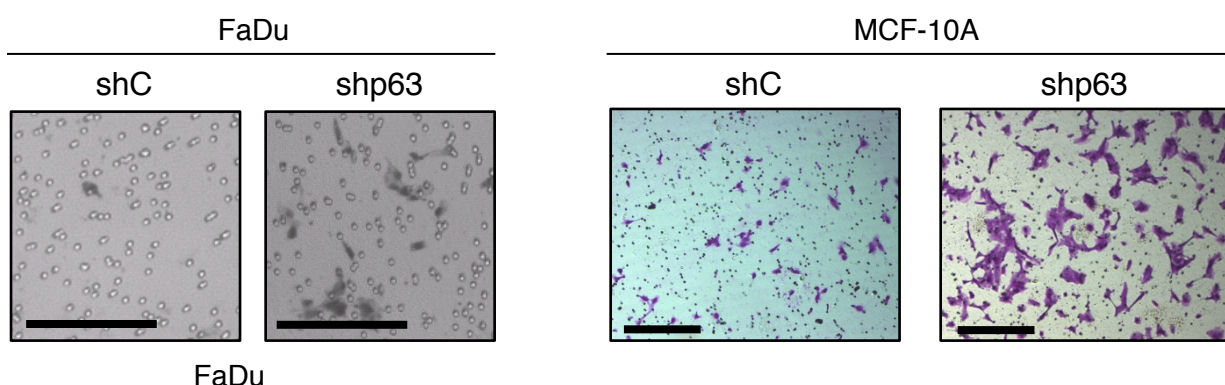**b**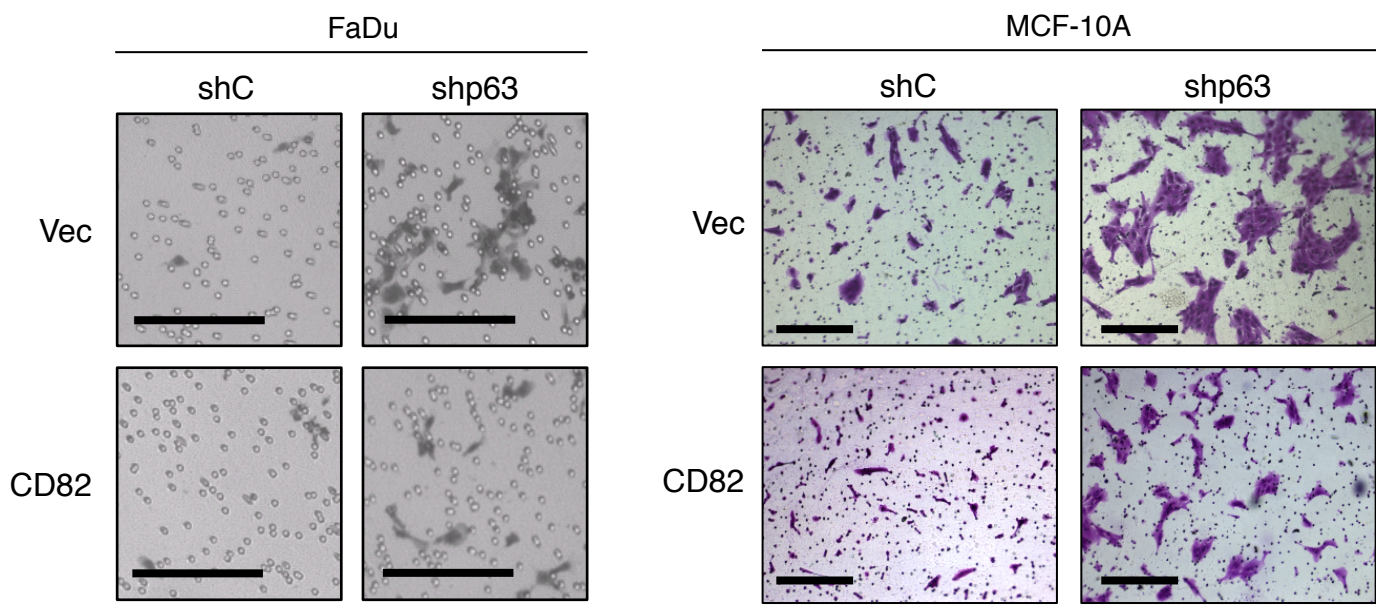**c**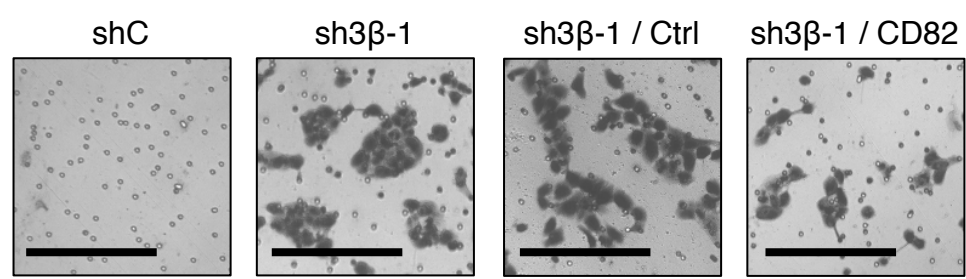

| Table S1. List of known target genes regulated by $\Delta$ Np63 $\alpha$ (fold change > 2). |      |                                                                  |             |      |                                                                 |
|---------------------------------------------------------------------------------------------|------|------------------------------------------------------------------|-------------|------|-----------------------------------------------------------------|
| Gene symbol                                                                                 | fold | reference                                                        | Gene symbol | fold | reference                                                       |
| ACP5                                                                                        | 3.1  | (Truong et al., 2006)                                            | IL32        | 2.5  | (Carroll et al., 2006)                                          |
| AKR1B10                                                                                     | -5.6 | (Truong et al., 2006)                                            | ITGA6       | 2.0  | (Carroll et al., 2006; Truong et al., 2006)                     |
| ANXA8                                                                                       | 13.6 | (Osada et al., 2005)                                             | JUN         | 2.1  | (Testoni et al., 2006)                                          |
| ARHGDI3                                                                                     | 4.0  | (Carroll et al., 2006)                                           | KCTD12      | 4.4  | (Truong et al., 2006)                                           |
| BHLHB3                                                                                      | 2.3  | (Adorno et al., 2009)                                            | KRT14       | 31.6 | (Boldrup et al., 2007; Candi et al., 2006; Romano et al., 2007) |
| CSTA                                                                                        | 3.6  | (Barbieri et al., 2006)                                          | KYNU        | 2.4  | (Truong et al., 2006)                                           |
| CTGF                                                                                        | -2.5 | (Carroll et al., 2006)                                           | LAMC2       | 3.5  | (Carroll et al., 2006)                                          |
| DUSP1                                                                                       | 3.0  | (Truong et al., 2006)                                            | LAMB3       | 2.0  | (Carroll et al., 2006)                                          |
| EGFR                                                                                        | 2.1  | Carroll et al., 2006; Nishi et al., 2001)                        | LPXN        | 2.4  | (Carroll et al., 2006)                                          |
| FABP4                                                                                       | 19.7 | (Truong et al., 2006)                                            | MAST4       | 2.1  | (Osada et al., 2005)                                            |
| FEZ1                                                                                        | 6.2  | (Osada et al., 2005)                                             | MT1X        | 2.9  | (Sasaki et al., 2005; Truong et al., 2006)                      |
| FLG                                                                                         | 4.1  | (Barbieri et al., 2006; Candi et al., 2006; Truong et al., 2006) | NR4A2       | -2.0 | (Pozzi et al., 2009)                                            |
| FST                                                                                         | 2.1  | (Barbieri et al., 2006)                                          | NT5E        | 2.5  | (Osada et al., 2005)                                            |
| GM2A                                                                                        | 2.0  | (Truong et al., 2006)                                            | PBX1        | -2.1 | (Barbieri et al., 2006; Truong et al., 2006)                    |
| HBEGF                                                                                       | 2.4  | (Wu et al., 2003)                                                | PERP        | 2.4  | (Ihrie et al., 2005)                                            |
| HEY1                                                                                        | 2.4  |                                                                  | PKNOX2      |      | (Testoni et al., 2006)                                          |
| ICAM1                                                                                       | 2.2  | (Carroll et al., 2006; Kikuchi et al., 2004)                     | PLLP        | 3.7  | (Osada et al., 2005)                                            |
| IL1A                                                                                        | 6.7  | (Barbieri et al., 2006; Truong et al., 2006)                     | POSTN       | -3.8 | (Barbieri et al., 2006)                                         |
| IL1B                                                                                        | 4.8  | (Truong et al., 2006)                                            | PTGS1       | 6.7  | (Truong et al., 2006)                                           |
| IL1F5                                                                                       | 10.3 | (Truong et al., 2006)                                            | S100A2      | 13.9 | (Kirschner et al., 2008; Lapi et al., 2006)                     |
| IL1R1                                                                                       | 3.7  | (Truong et al., 2006)                                            | SAA1        | 18.2 | (Truong et al., 2006)                                           |
| IL1RN                                                                                       | 2.1  | (Truong et al., 2006)                                            | SLC7A11     | 2.0  | (Wu et al., 2003)                                               |
| IL32                                                                                        | 2.5  | (Carroll et al., 2006)                                           | TNC         | 2.5  | (Barbieri et al., 2006)                                         |

Table S2. Ontological classification of  $\Delta$ Np63 $\alpha$ -regulated genes.

| <b>Ontological classification</b> | <b>Up-regulated</b> | <b>Down-regulated</b> |
|-----------------------------------|---------------------|-----------------------|
| Cell communication                | 49                  | 28                    |
| Development                       | 48                  | 18                    |
| Cell differentiation              | 29                  | 6                     |
| Immune syst. process              | 22                  | 6                     |
| Response to stress                | 21                  | 9                     |
| Apoptosis                         | 12                  | 5                     |
| Cell proliferation                | 13                  | 4                     |
| Cell cycle                        | 8                   | 5                     |
| Cell adhesion                     | 19                  | 9                     |
| Cell migration / motility         | 14                  | 0                     |

Table S3. Ontological classification of genes up-regulated by wild type  $\Delta$ Np63 $\alpha$  in Hs-578T cells.

| <b>Ontological Classification</b> | <b>Gene names</b>  |         |       |          | <b>Ontological Classification</b> | <b>Gene names</b>               |         |          |         |          |
|-----------------------------------|--------------------|---------|-------|----------|-----------------------------------|---------------------------------|---------|----------|---------|----------|
| <b>Cell communication</b>         | ANGPTL2            | DUSP6   | INHBA | PBEF1    | <b>Immune syst. process</b>       | ARHGDIB                         | CTSS    | IL1B     | INHBA   |          |
|                                   | ANGPTL4            | EGFR    | ITGA6 | PITPNC1  |                                   | BLNK                            | CXCL2   | IL1F5    | ITGA6   |          |
|                                   | ARHGDIB            | EPAS1   | ITPR2 | RAPGEF5  |                                   | C3                              | CXCL3   | IL1R1    | PODXL   |          |
|                                   | BLNK               | EPO     | KLRC1 | RASAL2   |                                   | CD24                            | EPO     | IL1RN    | SAA1    |          |
|                                   | C3                 | FST     | KLRC2 | S100A11  |                                   | CLEC4A                          | FCGR2C  | IL32     |         |          |
|                                   | CAP2               | FZD3    | LOX   | SNAI2    |                                   | CSF2                            | IL1A    | IL6R     |         |          |
|                                   | CD24               | GRB14   | LPXN  | SOD2     |                                   | <b>Response to stress</b>       | ANGPTL4 | DUSP1    | IL1A    | SAA1     |
|                                   | CLEC4A             | HBEGF   | MCTP2 | SPHK1    |                                   |                                 | BLNK    | EGFR     | IL1B    | SERPINA1 |
|                                   | CSF2               | HEY1    | MT1X  | TNC      |                                   |                                 | C3      | EPAS1    | IL1F5   | SOD2     |
|                                   | CXCL2              | IL1A    | NAB1  | TNFAIP3  |                                   |                                 | CD24    | EPO      | IL1R1   |          |
|                                   | CXCL3              | IL1B    | NEDD9 |          |                                   |                                 | CXCL2   | FABP4    | IL1RN   |          |
|                                   | DIRAS3             | IL1R1   | NRG1  |          |                                   | CXCL3                           | HBEGF   | PTGS1    |         |          |
|                                   | DUSP1              | IL6R    | P2RY6 |          |                                   | <b>Apoptosis</b>                | ANGPTL4 | CSF2     | INHBA   | SOD2     |
|                                   | <b>Development</b> | ANGPTL2 | EPAS1 | IL6R     |                                   |                                 | NRG1    | BCL2A1   | IL1A    | PERP     |
| ANGPTL4                           |                    | EPO     | INHBA | PAPPA    | CD24                              |                                 | IL1B    | SERPINB2 | TNFAIP3 |          |
| ARHGDIB                           |                    | FEZ1    | ITGA6 | PERP     | <b>Cell proliferation</b>         | CD24                            | FSCN1   | IL1B     | SPHK1   |          |
| BCL2A1                            |                    | FLG     | JUN   | PLXDC1   |                                   | CSF2                            | FZD3    | IL6R     |         |          |
| BLNK                              |                    | FLI1    | KRT14 | PTGS1    |                                   | EGFR                            | HBEGF   | PBEF1    |         |          |
| CAP2                              |                    | FST     | KRT17 | RAPGEF5  |                                   | EHF                             | IL1A    | S100A11  |         |          |
| CD24                              |                    | FZD3    | LAMB3 | SERPINB2 | <b>Cell cycle</b>                 | DIRAS3                          | EGFR    | IL1B     | NEDD9   |          |
| CSF2                              |                    | HBEGF   | LAMC2 | SNAI2    |                                   | DUSP6                           | IL1A    | INHBA    | SPHK1   |          |
| CSTA                              |                    | HEY1    | LOX   | SOD2     | <b>Cell adhesion</b>              | ARHGDIB                         | FEZ1    | LAMB3    | PODXL   |          |
| DFNA5                             |                    | HMGA2   | NAB1  | SPHK1    |                                   | CD24                            | FZD3    | LAMC2    | SAA1    |          |
| EGFR                              |                    | IL1A    | NEDD9 | TNC      |                                   | CD82                            | ICAM1   | LPXN     | TMEM8   |          |
| EHF                               |                    | IL1B    | NOV   | TNFAIP3  |                                   | CLEC4A                          | IL32    | NEDD9    | TNC     |          |
| <b>Cell differentiation</b>       |                    | ANGPTL4 | EPAS1 | INHBA    |                                   | SERPINB2                        | EGFR    | ITGA6    | PERP    |          |
|                                   |                    | BCL2A1  | EPO   | JUN      | SOD2                              | <b>Cell migration/ motility</b> | ARHGDIB | DUSP6    | IL1B    | SAA1     |
|                                   | BLNK               | FEZ1    | KRT14 | SPHK1    | CALD1                             |                                 | EGFR    | ITGA6    | SPHK1   |          |
|                                   | CD24               | FLG     | NAB1  | TNC      | CD24                              |                                 | FEZ1    | PODXL    |         |          |
|                                   | CSF2               | FST     | NRG1  | TNFAIP3  | CD82                              |                                 | HBEGF   | S100A2   |         |          |
|                                   | CSTA               | HEY1    | PAPPA |          |                                   |                                 |         |          |         |          |
|                                   | DFNA5              | IL1A    | PERP  |          |                                   |                                 |         |          |         |          |
|                                   | EHF                | IL1B    | PTGS1 |          |                                   |                                 |         |          |         |          |

| Table S4. Oligonucleotides used for mutagenesis, ChIP, PCR, Q-PCR, siRNA, and shRNA. |                                     |             |
|--------------------------------------------------------------------------------------|-------------------------------------|-------------|
| Oligonucleotide                                                                      | Sequence                            | Applicaiton |
| Human p63 shRNA                                                                      | CCGTTTCGTCAGAACACACAT               | shRNA       |
| CD82 shRNA-1                                                                         | GTTTCATCTCTGTCCTGCAAA               | shRNA       |
| CD82 shRNA-2                                                                         | CTTCTACAACCTGGACAGACAA              | shRNA       |
| CD82 shRNA-3                                                                         | AAGAGCAGTTTCATCTCTGTC               | shRNA       |
| CD82 shRNA-5                                                                         | CCTGGCCGACAAGAGCAGTTT               | shRNA       |
| GSK3 $\beta$ shRNA                                                                   | AAGTGATTGGCAATGGAATGGCTCAT          | shRNA       |
| $\beta$ -Catenin siRNA                                                               | AGCTGATATTGATGGACAGdTdT             | siRNA       |
| Lamin A/C siRNA                                                                      | CUGGACUUCCAGAAGAACAAdTdT            | siRNA       |
| P1 fwd                                                                               | CTCATCAACCCACACCTCCT                | ChIP        |
| P1 rev                                                                               | CTAGCCCTTGAATTCCCACA                | ChIP        |
| P2 fwd                                                                               | ACAGGGTTTCATCCTGTTGC                | ChIP        |
| P2 rev                                                                               | CCTACAGCCACCTCTTCGTC                | ChIP        |
| Human p63 fwd                                                                        | GTTATCCGCGCCATGCCTGTCTAC            | Q-PCR       |
| Human p63 rev                                                                        | TCCCCTCTACTCGAATCAAATG              | Q-PCR       |
| CD82 fwd                                                                             | AGCGCGGAGCAGAAAGCAGAACC             | Q-PCR       |
| CD82 rev                                                                             | GCCCCACGCCGATGAAGACA                | Q-PCR       |
| $\beta$ -Catenin fwd                                                                 | GTGGAGGGGGTCCGCATGGAAGAA            | Q-PCR       |
| $\beta$ -Catenin rev                                                                 | GAGAATAAAGCAGCTGCACAAACAATGGA       | Q-PCR       |
| GAPDH fwd                                                                            | GGGGAGCCAAAAGGGTCATCATCT            | Q-PCR       |
| GAPDH rev                                                                            | GAGGGGCCATCCACAGTCTTCT              | Q-PCR       |
| Murine $\Delta$ Np63 $\alpha$ -C306R                                                 | CTTTGAGGCCAGGATCCGTGCTTGCCCA<br>GGA | Mutagenesis |
| Murine $\Delta$ Np63 $\alpha$ -C526W                                                 | GGGCTGCTCATCATGGCTGGACTATTTCA<br>CG | Mutagenesis |
| Murine $\Delta$ Np63 $\alpha$ fwd                                                    | GAAGATCTATGTTGTACCTGG               | Cloning     |
| Murine $\Delta$ Np63 $\alpha$ rev                                                    | GTAACTCATTCTCCTTCCTC                | Cloning     |
